# Supplementary material for: Switching the ligand-exchange reactivities of chloro-bridged cyclopalladated azobenzenes for the colorimetric sensing of thiocyanate
Source: Royal Society of Chemistry journal article supplement (doi:10.1039/b903752g), 2009-01-01
Supplement: b903752g.pdf [file b903752g.pdf]

## SUPPORTING INFORMATION

### Switching the ligand-exchange reactivities of chloro-bridged cyclopalladated azobenzenes for chromogenic sensing of thiocyanate

Shunhua Li\*, Yuefeng Zhou, Chunwei Yu, Feiran Chen, and Jingou Xu\*

#### Contents

Reagents (including synthesis)

NMR spectra of **AbP**

TOF-MS spectrum of **AbP**

XPS spectra of **AbP**

FT-IR spectra of the relative compounds

Effect of pH on the thiocyanate-sensing responses of **MoP**

Spectral traces of **AbP** upon addition of thiocyanate

Plots for measuring the binding stoichiometry between **MoP** and thiocyanate

References in *Supporting Information*

## 1. Reagents

Potassium tetrachloropalladate(II) was purchased from Sigma-Aldrich Co., Ltd. Methyl orange was purchased from Tokyo Chemical Industry (TCI) Co., Ltd. They were used without any further purification. All other reagents were of analytical grade or better and used without further purification.

**4,4'-bis(hydroxy)-azobenzene:** 4,4'-Dihydroxyazobenzene was prepared based on the method of Willstätter and Benz<sup>[1]</sup>. A mixture of KOH (25 g, 380 mmol), *p*-nitrophenol (5 g, 36 mmol), and water (6 mL) was heated to 120 °C and left to stand for 1 h. When the temperature slowly rose to 195-200 °C, the reaction vigorously started to give a brown viscous liquid with a large number of bubbles developing. After the reaction was completed, products were dissolved in water. A dark-red solution was acidified to pH 3 with concentrated HCl and extracted with ether. Combined ether extracts were dried over Na<sub>2</sub>SO<sub>4</sub> overnight. Ether was removed to dryness under vacuum. Residue was recrystallized from 50% (v/v) ethanol aqueous solution to give yellow crystals of 4,4'-Dihydroxyazobenzene (2.3 g). TOF-MS: *m/z* 215 (M + H). Selected <sup>1</sup>H NMR (400 MHz, DMSO-*d*<sub>6</sub>, ppm) data of the product: δ = 6.90 (d, 2 H, Ph-H, J(HH) = 8 Hz), 7.71 (d, 2 H, Ph-H, J(HH) = 9 Hz), 10.13 (s, 1 H, Ph-OH).

**MoP:** **MoP** was prepared as we have reported elsewhere.<sup>[2,3]</sup> 5 mL aqueous solution of potassium tetrachloropalladate(II) (66 mg, 0.2 mmol) was slowly added into a solution of methyl orange (100 mg, 0.3 mmol) in 30 mL dioxan/water (1:1) mixture. The reaction mixture was stirred at room temperature for a week to give a claret solution. The solvent was evaporated to ca. 1.5 mL under vacuum. The precipitate was collected and washed with ethanol and diethyl ether. The obtained solid was dried under vacuum to give 53 mg of **MoP**-2K (52% yield). Potassium tetrachloropalladate(II) was used as needle crystals in this preparation. Selected <sup>1</sup>H NMR (400 MHz, DMSO-*d*<sub>6</sub>, ppm) data of the product: δ = 3.17 (s, 6H, N-CH<sub>3</sub>), 6.77 (d, 2 H, Ph-H, J(HH) = 9 Hz), 6.85 (d, 1 H, Ph-H, J(HH) = 9 Hz), 7.72 (s, 1 H, Ph-H), 7.80 (d, 2 H, Ph-H, J(HH) = 9 Hz), 7.88 (d, 2 H, Ph-H, J(HH) = 9 Hz), 2.50 (DMSO).

**AbP:** In a typical preparation, 4,4'-bis(hydroxy)-azobenzene (44 mg, 0.2 mmol) and potassium tetrachloropalladate(II) (66 mg, 0.2 mmol) were dissolved in 30 mL dioxane-water (1:1) mixture. The mixture was stirred at room temperature for a week to give a brown solution. The solvent was evaporated to ca. 1.5 mL under vacuum. The precipitate was collected and washed with ethanol and diethyl ether, respectively. The obtained solid was dried under vacuum to give 62 mg of **AbP**·3H<sub>2</sub>O (76% yield). Elemental analysis (%) calcd for C<sub>24</sub>H<sub>24</sub>N<sub>4</sub>O<sub>7</sub>Cl<sub>2</sub>Pd<sub>2</sub>: N 7.33, C 37.72, H 3.17; found: N 7.00, C 37.77, H 3.06. XPS: Pd (4d, 3p, MNV, 3d<sub>5/2</sub> = 337.9 eV, 3d<sub>3/2</sub> = 343.1 eV); Cl (2p, 2d<sub>3/2</sub> = 198.6 eV, 2d<sub>1/2</sub> = 200.1 eV); C (1s); N (1s); O(1s). <sup>1</sup>H NMR (400 MHz, DMSO-*d*<sub>6</sub>, ppm): δ = 6.59 (d, 1 H, Pd-Ph-*H*), 6.82 (d, 2 H, Ph-*H*), 7.10 (s, 1 H, Pd-Ph-*H*), 7.60 (d, 2 H, Ph-*H*), 7.66 (d, 1 H, Pd-Ph-*H*), 10.09 (s, 1 H, OH), 10.52 (s, 1 H, OH), 2.50 (DMSO), 3.35 (H<sub>2</sub>O). <sup>13</sup>C NMR (100 MHz, DMSO-*d*<sub>6</sub>, ppm): δ = 114.80, 115.11, 115.42, 125.68, 125.83, 131.14, 143.96, 156.95, 159.42, 159.75. MOLDI-TOF-MS: *m/z* 709 (M - H), 727 (M + OH).

## 2. NMR spectra of AbP (Fig. S1)

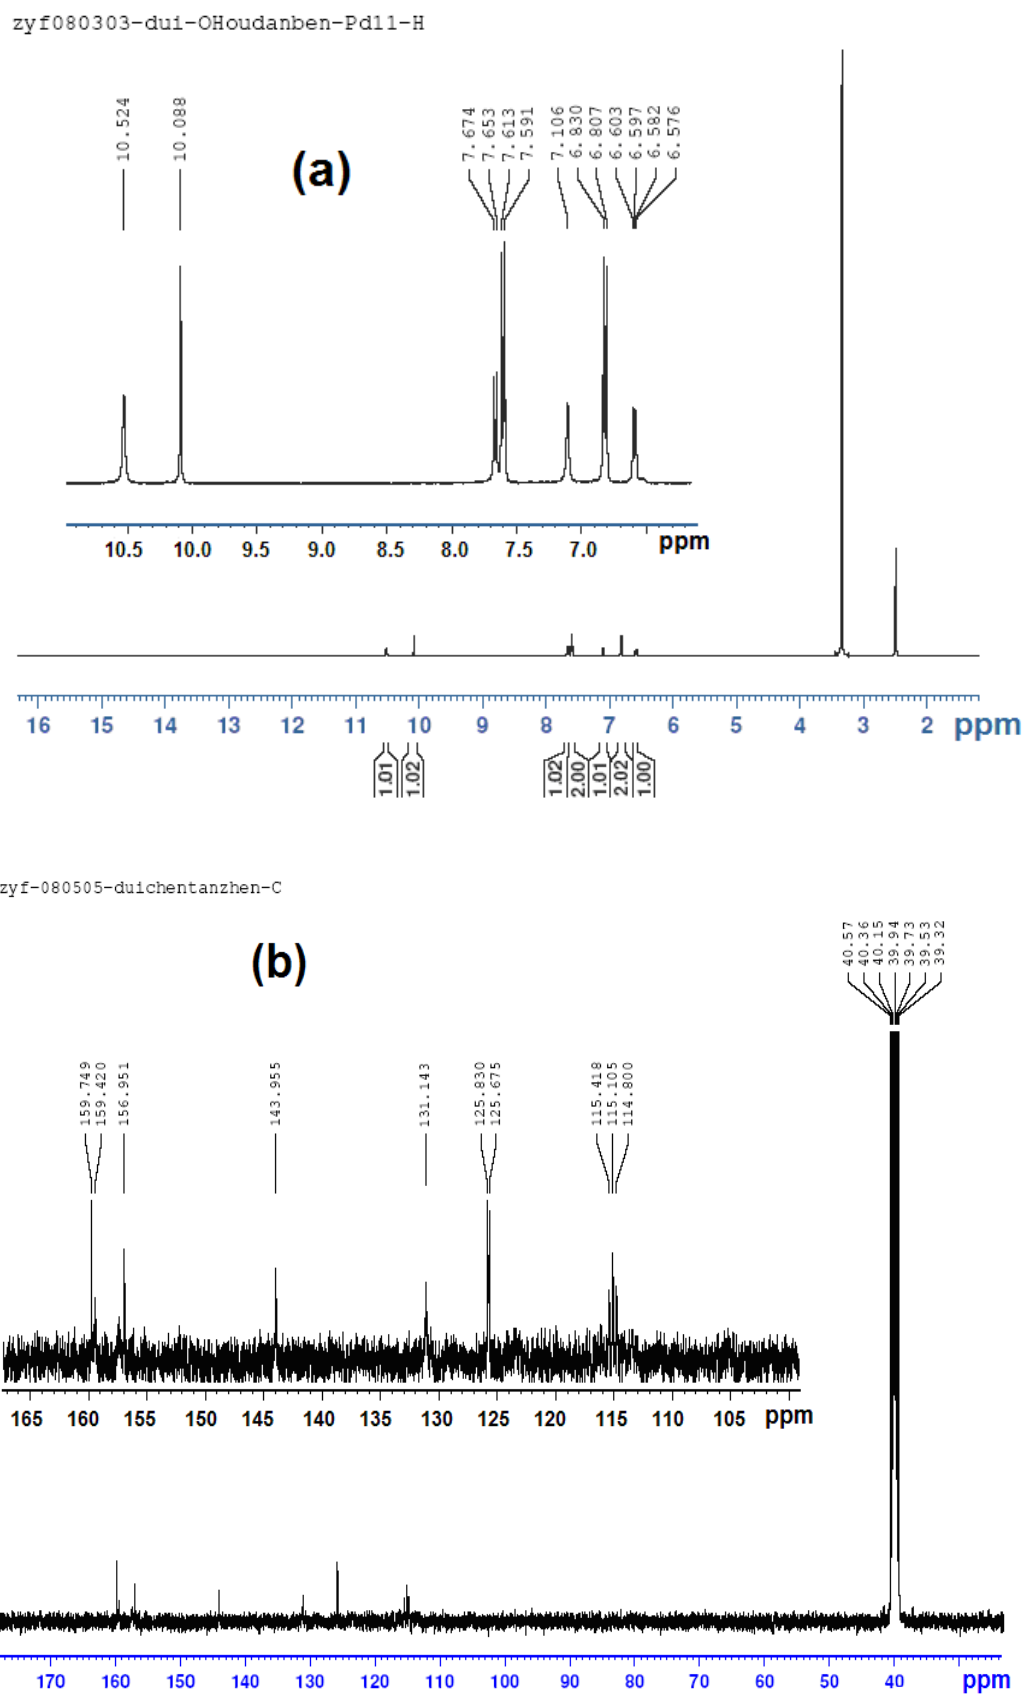

Fig. S1.  $^1\text{H}$  (a) and  $^{13}\text{C}$  (b) NMR spectra of AbP.

### 3. TOF-MS spectrum of AbP (Fig. S2)

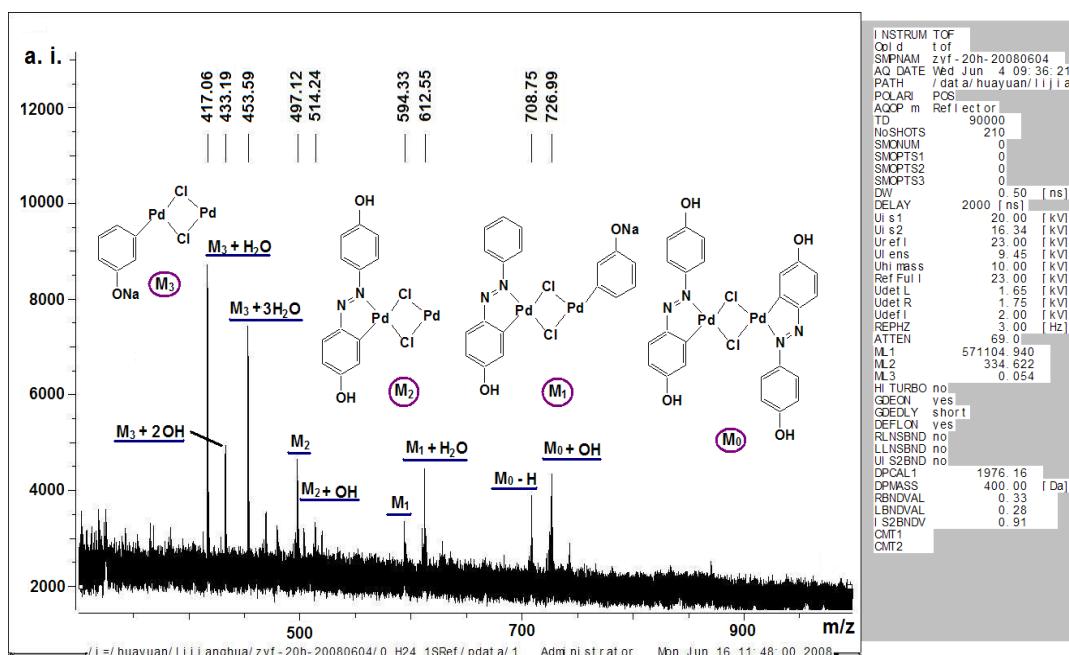

Fig. S2. MALDI-TOF-MS spectrum of AbP.

### 4. XPS spectra of AbP (Fig. S3)

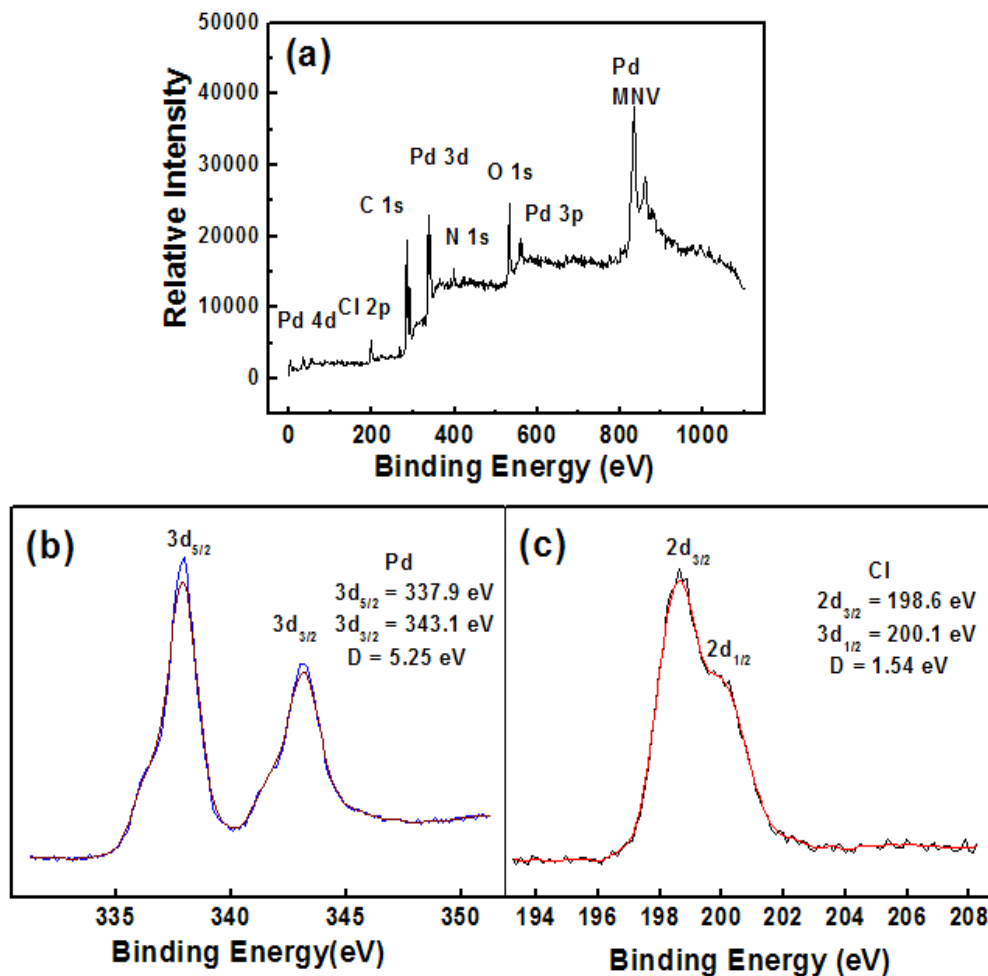

Fig. S3. Total (A), Pd 3d (B) and Cl 2d (C) XPS spectra of AbP solid.

## 5. FT-IR spectra of the relative compounds of AbP and MoP (Fig. S4)

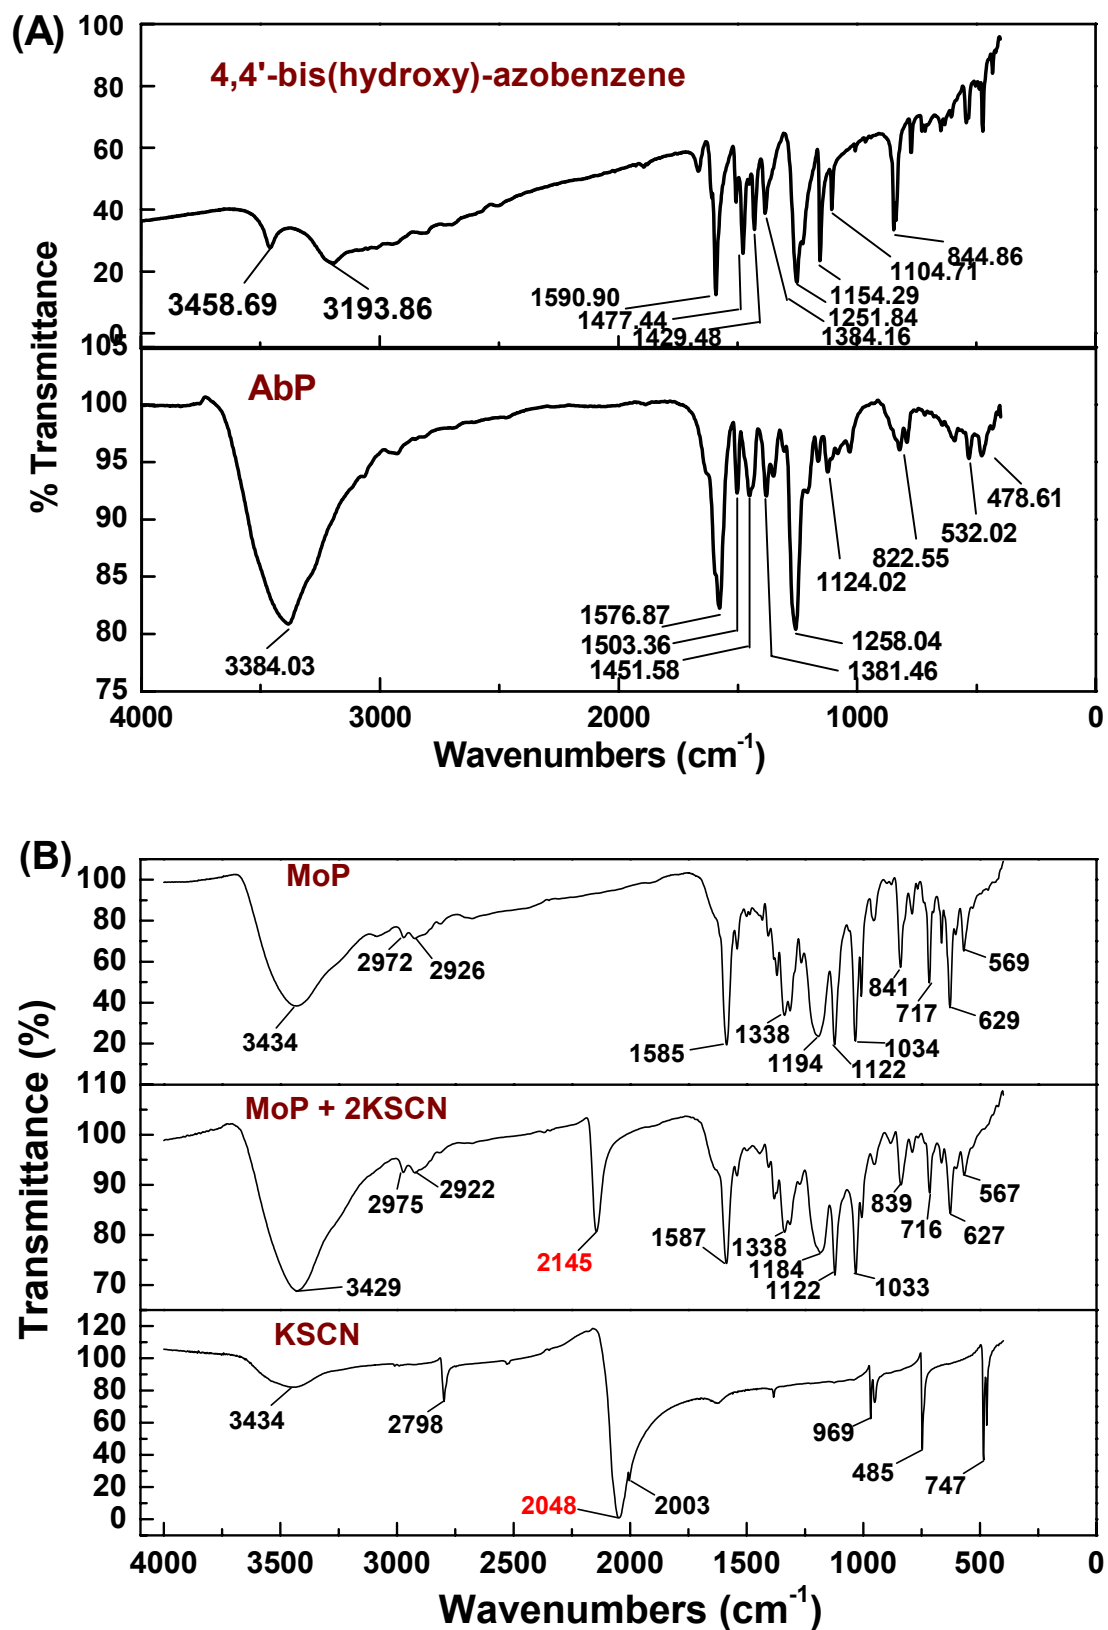

Fig. S4. IR absorption spectra of the relative compounds of AbP (A) and MoP (B) in KBr.

## 6. Effect of pH on the thiocyanate-sensing responses of MoP (Fig. S5)

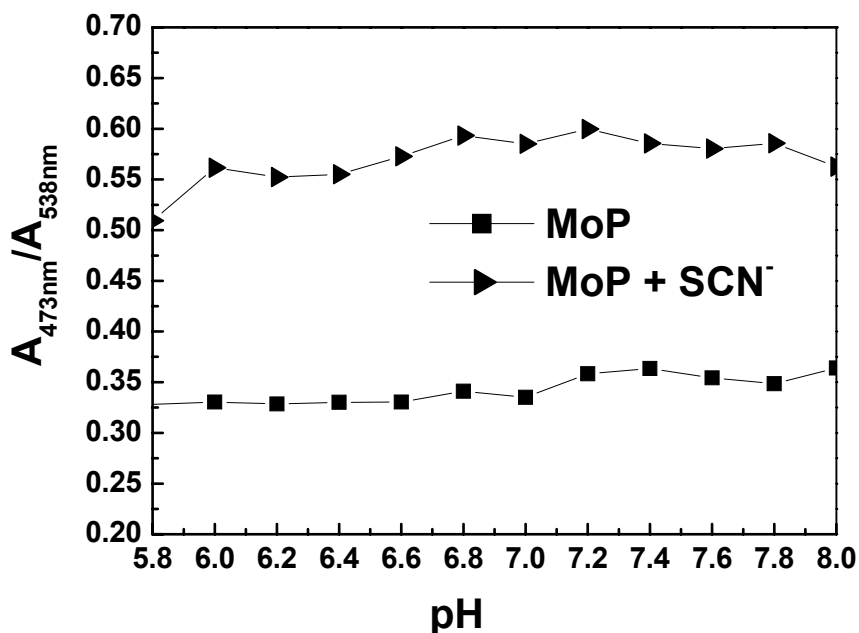

**Fig. S5.** Effect of pH on absorption changes of MoP solution upon addition of thiocyanate. [MoP]:  $1.0 \times 10^{-5}$  mol L<sup>-1</sup>; [SCN<sup>-</sup>]:  $5.0 \times 10^{-6}$  mol L<sup>-1</sup>; pH buffer: 0.02 mol L<sup>-1</sup> phosphates. Absorbance were measured after reacting for 0.5 h at room temperature.

## 7. Spectral traces of AbP upon addition of thiocyanate (Fig. S6)

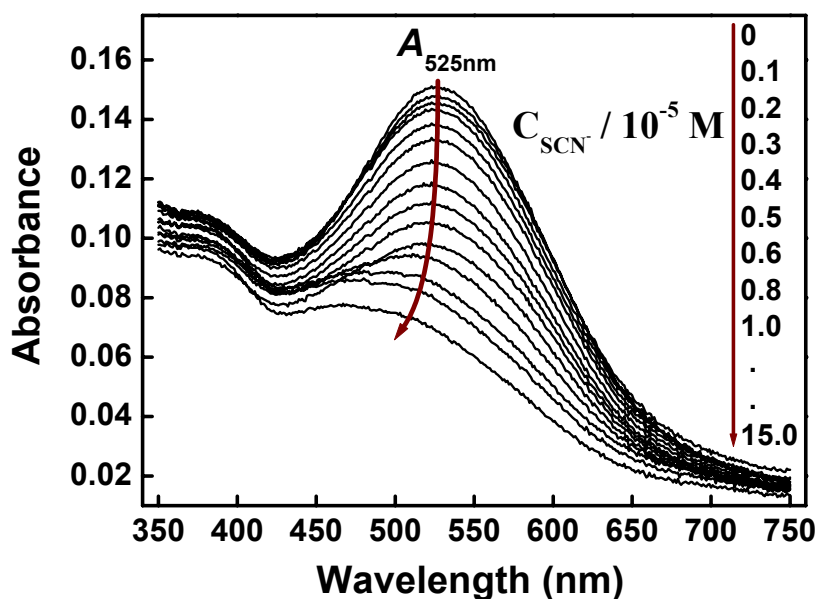

**Fig. S6.** Absorption evolution of AbP solution upon titration with sodium thiocyanate at pH 7.4. The sensing solutions of AbP were prepared as aqueous mixtures of AbP ( $1.0 \times 10^{-5}$  mol L<sup>-1</sup>), NaCl (0.1 mol L<sup>-1</sup>), Na<sub>2</sub>SO<sub>4</sub> (0.02 mol L<sup>-1</sup>), NaHCO<sub>3</sub> (0.03 mol L<sup>-1</sup>), NaNO<sub>2</sub> ( $2.0 \times 10^{-4}$  mol L<sup>-1</sup>), KNO<sub>3</sub> ( $1.0 \times 10^{-3}$  mol L<sup>-1</sup>) and buffer phosphates. Absorption spectra were recorded after reacting for 0.5 h at room temperature.

## 8. Plots for measuring the binding stoichiometry between MoP and thiocyanate (Fig. S7)

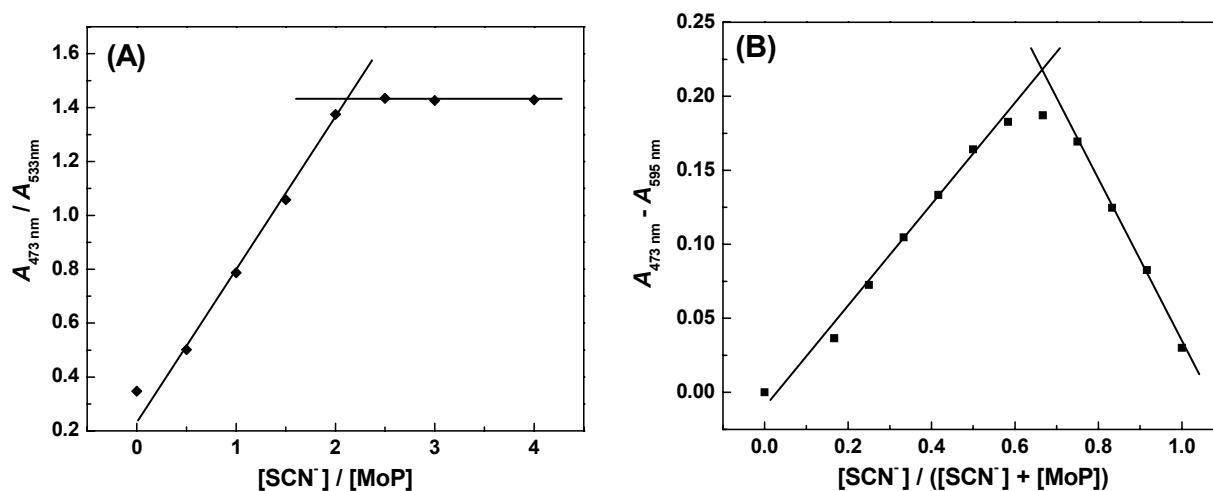

**Fig. S7.** Molar ratio variation plot (A) and Jot plot (B) suggesting the 1:2 binding stoichiometry between **MoP** and thiocyanate. (A):  $[\text{MoP}] = 2.0 \times 10^{-5} \text{ mol L}^{-1}$ ; (B):  $[\text{MoP}] + [\text{SCN}^-] = 6.0 \times 10^{-5} \text{ mol L}^{-1}$ ; buffer: pH 7.4,  $0.02 \text{ mol L}^{-1}$  phosphates. Molar absorption coefficient of **MoP** at 473 nm was equal to that at 495 nm in aqueous solution at pH 7.4.

## 8. References in Supporting Information

- [1] R. Willstätter and M. Benz, *Chem. Ber.*, 1906, **339**, 3492-3503.
- [2] S.-H. Li, C.-W. Yu, J.-G. Xu, *Chem. Commun.*, 2005, 250-252.
- [3] C.-W. Yu, S.-H. Li, J.-G. Xu, *Chinese J. Chem.*, 2007, **25**, 797-801.
